# Supplementary material
Source: Springer Nature journal article supplement (https://www.springermedizin.de/resource/supplementary/12943_2009_399_MOESM3_ESM.pdf/9554176)

A

GSK3 $\beta$ 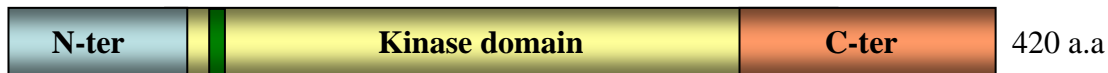

78 SGELVAIKKVLQDKR 92

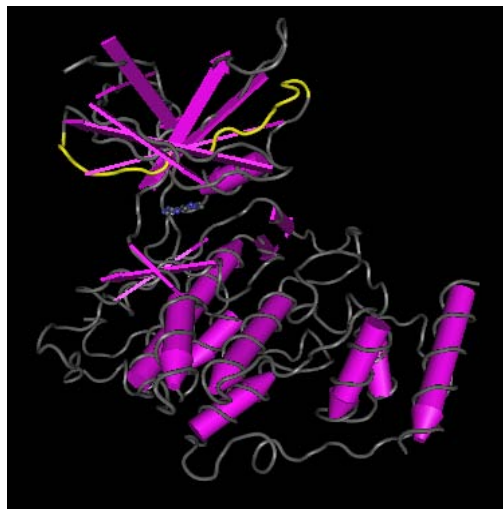

B

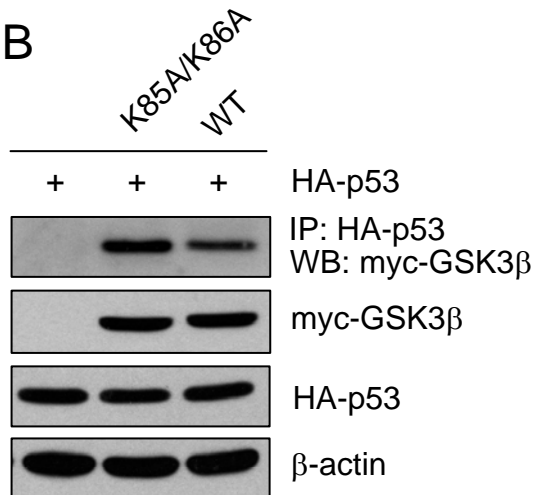

Supplement: MOESM3 [file 9554176]
